# Supplementary material
Source: MDPI journal article supplement (https://www.mdpi.com/2571-550X/4/2/18)
Supplement: s1 [file s1 › quaternary-1167122-supplementary.pdf]

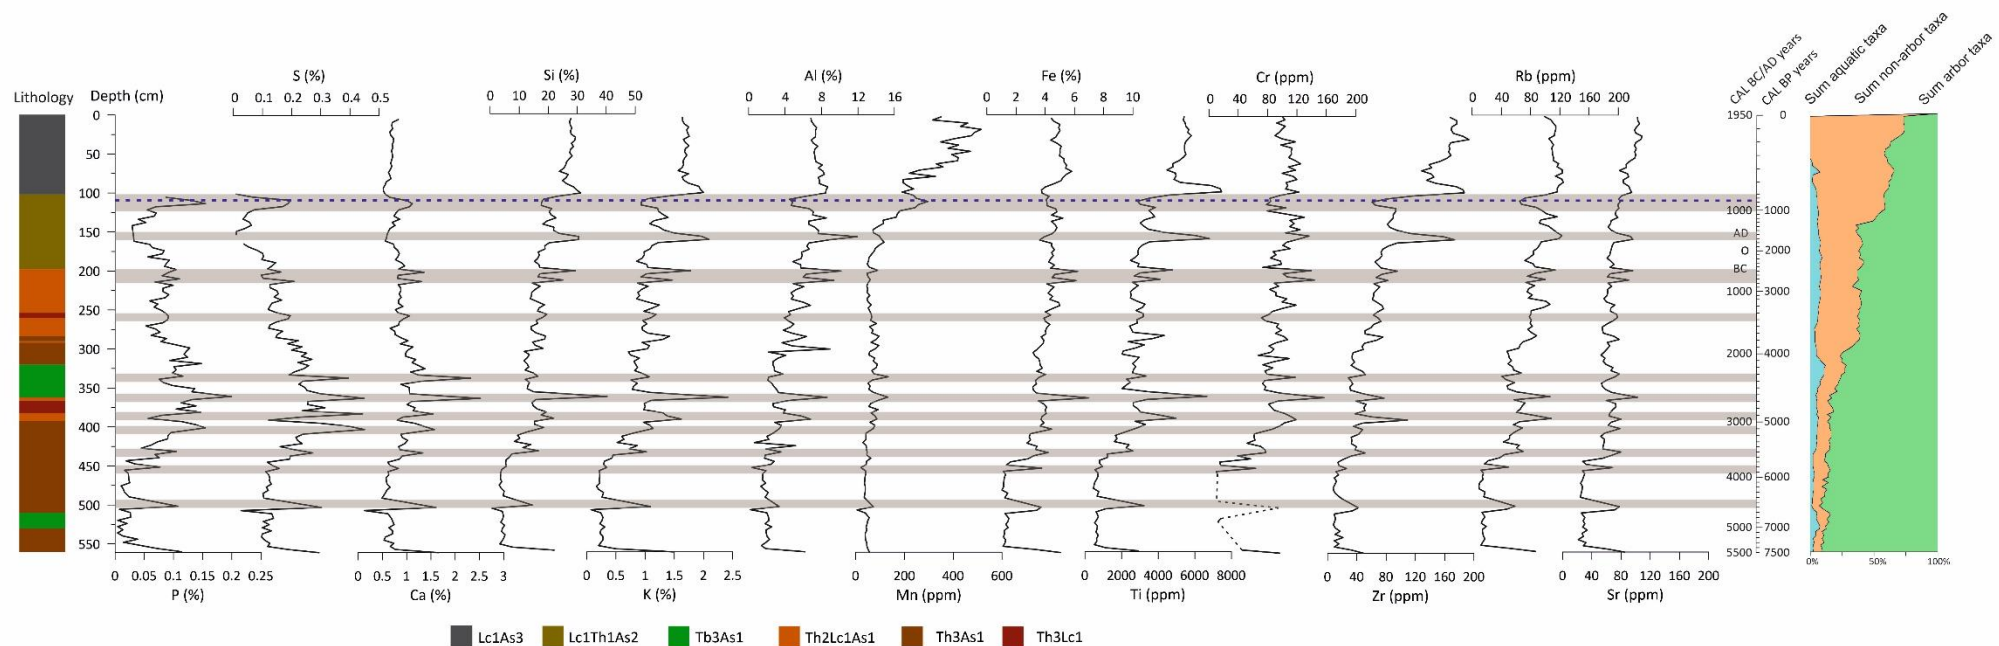

**Figure S1.** The elemental distribution at Round Lake compared to LOI (ash, organic matter, and carbonate content) from Tapody et al [3].

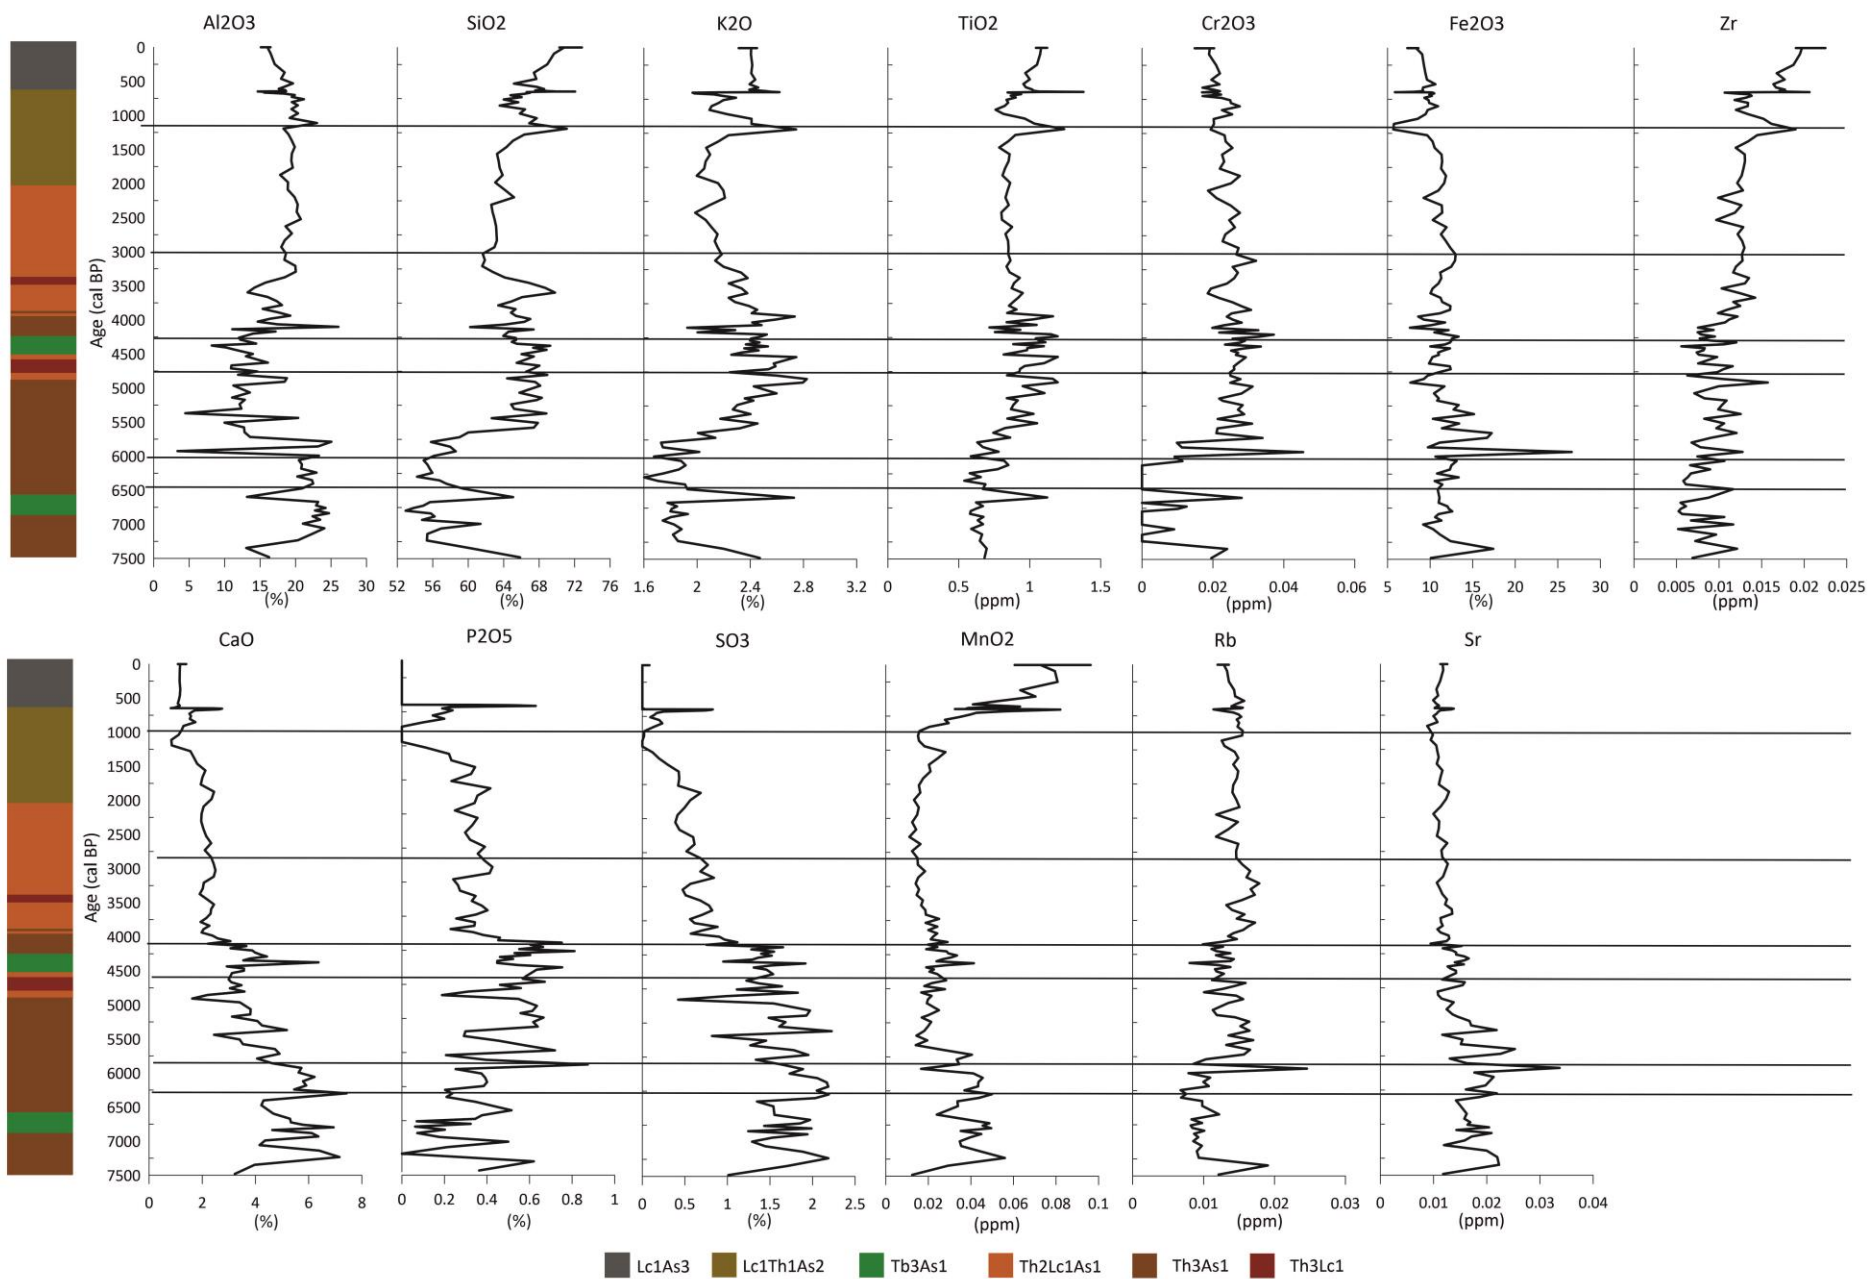

**Figure S2.** The elemental distribution at Round Lake calculated to oxid forms plotted against cal BP year.

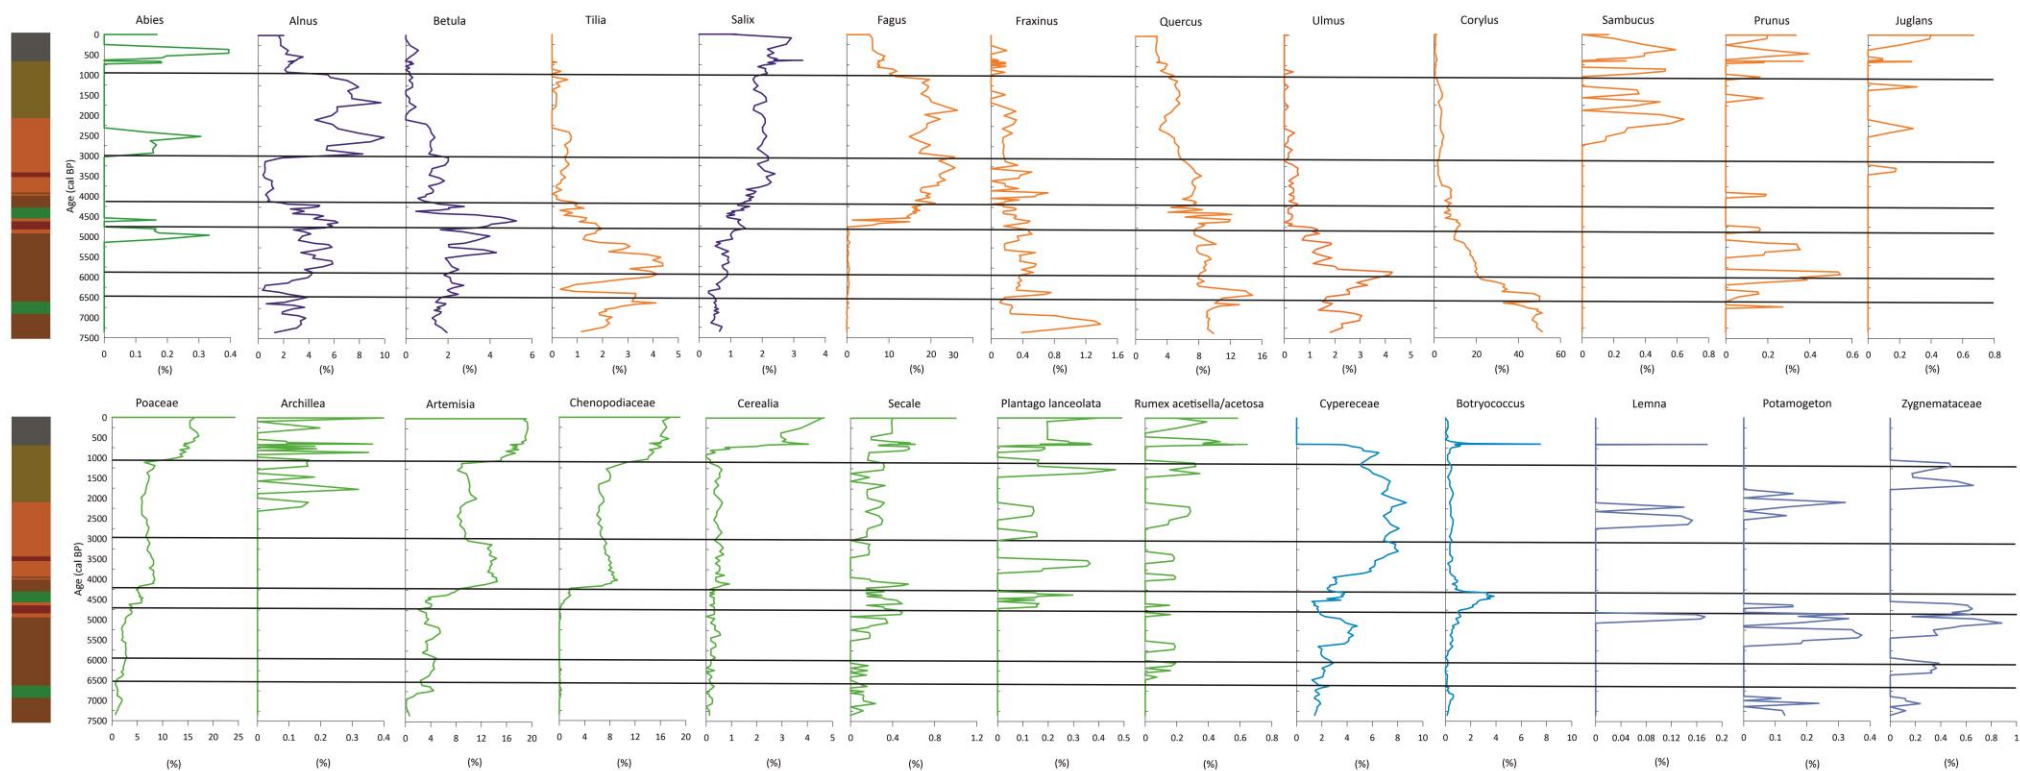

**Figure S3.** Percentage pollen diagram of selected arbor and non-arbor pollen taxa in the Holocene profile plotted against calibrated BP years.
